# Supplementary material for: Systematic Multiomics Analysis of Alterations in C1QBP mRNA Expression and Relevance for Clinical Outcomes in Cancers
Source: PubMed Central journal article supplement (PMC6517981; doi:10.3390/jcm8040513), 2019-04-15
Supplement: jcm-08-00513-s001.pdf [file jcm-08-00513-s001.pdf]

# Supplementary information: Systematic Multiomics Analysis of *C1QBP* mRNA Expression Alterations and Its Relevance of Clinical Outcomes in Cancers

Subbroto Kumar Saha<sup>1</sup>, Kyung Eun Kim<sup>2</sup>, S.M. Riazul Islam<sup>3</sup>, Ssang-Goo Cho<sup>1,\*</sup> and Minchan Gil<sup>1,\*</sup>

<sup>1</sup> Department of Stem Cell and Regenerative Biotechnology, Incurable Disease Animal Model & Stem Cell Institute (IDASI), Konkuk University, 120 Neungdong-ro, Gwangjin-gu, Seoul, 05029 Republic of Korea; subbroto@konkuk.ac.kr (S.K.S.), ssangoo@konkuk.ac.kr (S-G. C), minchangil@gmail.com (M.G.)

<sup>2</sup> Department of Cosmetic Sciences, Sookmyung Women's University, Cheongpa-ro 47-gil 100 (Cheongpa-dong 2ga), Yongsan-gu, Seoul 04310, Republic of Korea; kyungeun@sookmyung.ac.kr

<sup>3</sup> Department of Computer Science and Engineering, Sejong University, 209, Neungdong-ro, Gwangjin-gu, Seoul, 05006, Republic of Korea; riaz@sejong.ac.kr (S.M.R.I.)

\* Correspondence: ssangoo@konkuk.ac.kr; minchangil@gmail.com; Tel.: +82-10-2773-0173 (M.G.) +82-2-450-4207 (S.-G.C.); Fax.: +82-2-444-4207 (S.-G.C. and M.G.)

Supplementary Table S1. Datasets of *C1QBP* expression in breast cancer (Oncomine database).

| Dataset    | Normal (Cases)          | Tumor (Cases)                                              | Fold change | t-Test | p-value  | Rank (%) |
|------------|-------------------------|------------------------------------------------------------|-------------|--------|----------|----------|
| Curtis     | Breast (144)            | Tubular Breast Carcinoma (67)                              | 1.45        | 9.507  | 2.82E-16 | 8        |
|            | Breast (144)            | Breast Carcinoma (14)                                      | 1.585       | 4.275  | 3.94E-04 | 9        |
|            | Breast (144)            | Invasive Breast Carcinoma (21)                             | 1.382       | 4.217  | 1.67E-04 | 11       |
|            | Breast (144)            | Invasive Ductal Breast Carcinoma (1,556)                   | 1.359       | 14.336 | 9.46E-34 | 15       |
|            | Breast (144)            | Invasive Ductal and Invasive Lobular Breast Carcinoma (90) | 1.326       | 7.262  | 1.06E-11 | 15       |
|            | Breast (144)            | Ductal Breast Carcinoma in Situ (10)                       | 1.393       | 3.215  | 5.00E-03 | 15       |
|            | Breast (144)            | Mucinous Breast Carcinoma (46)                             | 1.399       | 5.779  | 1.70E-07 | 16       |
| Turashvili | Breast (144)            | Medullary Breast Carcinoma (32)                            | 1.445       | 4.28   | 7.12E-05 | 18       |
|            | Ductal Breast Cell (10) | Invasive Ductal Breast Carcinoma (5)                       | -1.584      | -2.25  | 0.022    | 7        |
| Finak      | Breast (6)              | Invasive Breast Carcinoma (53)                             | -2.716      | -9.253 | 1.20E-11 | 15       |

Supplementary Table S2. Survival analyses of *C1QBP* in breast cancer (Prognoscan database).

| DATASET        | ENDPOINT                         | ARRAY TYPE                  | PROBE ID     | N          | COX <i>p</i> -VALUE | HR [95% CI-low CI-upp]    |
|----------------|----------------------------------|-----------------------------|--------------|------------|---------------------|---------------------------|
| GSE19615       | Distant Metastasis Free Survival | HG-U133_Plus_2              | 208910_s_at  | 115        | 0.371956            | 0.52 [0.12 - 2.20]        |
| GSE19615       | Distant Metastasis Free Survival | HG-U133_Plus_2              | 214214_s_at  | 115        | 0.169939            | 0.35 [0.08 - 1.57]        |
| GSE12276       | Relapse Free Survival            | HG-U133_Plus_2              | 214214_s_at  | 204        | 0.43914             | 1.14 [0.82 - 1.59]        |
| GSE12276       | Relapse Free Survival            | HG-U133_Plus_2              | 208910_s_at  | 204        | 0.537201            | 1.10 [0.81 - 1.50]        |
| GSE6532-GPL570 | Relapse Free Survival            | HG-U133_Plus_2              | 214214_s_at  | 87         | 0.565589            | 1.24 [0.59 - 2.62]        |
| GSE6532-GPL570 | Relapse Free Survival            | HG-U133_Plus_2              | 208910_s_at  | 87         | 0.462749            | 1.30 [0.65 - 2.60]        |
| GSE6532-GPL570 | Distant Metastasis Free Survival | HG-U133_Plus_2              | 214214_s_at  | 87         | 0.565589            | 1.24 [0.59 - 2.62]        |
| GSE6532-GPL570 | Distant Metastasis Free Survival | HG-U133_Plus_2              | 208910_s_at  | 87         | 0.462749            | 1.30 [0.65 - 2.60]        |
| GSE9195        | Relapse Free Survival            | HG-U133_Plus_2              | 214214_s_at  | 77         | 0.439715            | 0.68 [0.25 - 1.83]        |
| GSE9195        | Relapse Free Survival            | HG-U133_Plus_2              | 208910_s_at  | 77         | 0.314056            | 0.66 [0.29 - 1.49]        |
| GSE9195        | Distant Metastasis Free Survival | HG-U133_Plus_2              | 208910_s_at  | 77         | 0.566883            | 0.76 [0.30 - 1.94]        |
| GSE9195        | Distant Metastasis Free Survival | HG-U133_Plus_2              | 214214_s_at  | 77         | 0.746708            | 0.83 [0.27 - 2.58]        |
| GSE12093       | Distant Metastasis Free Survival | HG-U133A                    | 208910_s_at  | 136        | 0.468174            | 0.77 [0.38 - 1.57]        |
| GSE12093       | Distant Metastasis Free Survival | HG-U133A                    | 214214_s_at  | 136        | 0.423397            | 1.50 [0.55 - 4.07]        |
| GSE11121       | Distant Metastasis Free Survival | HG-U133A                    | 208910_s_at  | 200        | 0.578022            | 0.80 [0.36 - 1.77]        |
| GSE11121       | Distant Metastasis Free Survival | HG-U133A                    | 214214_s_at  | 200        | 0.063933            | 2.07 [0.96 - 4.49]        |
| <b>GSE9893</b> | <b>Overall Survival</b>          | <b>MLRG Human 21K V12.0</b> | <b>19328</b> | <b>155</b> | <b>0.011484</b>     | <b>1.32 [1.06 - 1.64]</b> |
| GSE2034        | Distant Metastasis Free Survival | HG-U133A                    | 208910_s_at  | 286        | 0.354935            | 0.81 [0.51 - 1.27]        |
| GSE2034        | Distant Metastasis Free Survival | HG-U133A                    | 214214_s_at  | 286        | 0.878539            | 1.04 [0.64 - 1.68]        |
| GSE1456-GPL96  | Overall Survival                 | HG-U133A                    | 208910_s_at  | 159        | 0.207785            | 1.49 [0.80 - 2.79]        |
| GSE1456-GPL96  | Disease Specific Survival        | HG-U133A                    | 214214_s_at  | 159        | 0.155031            | 1.85 [0.79 - 4.34]        |
| GSE1456-GPL96  | Relapse Free Survival            | HG-U133A                    | 208910_s_at  | 159        | 0.110369            | 1.66 [0.89 - 3.11]        |
| GSE1456-GPL96  | Overall Survival                 | HG-U133A                    | 214214_s_at  | 159        | 0.28609             | 1.49 [0.72 - 3.12]        |

|                   |                                     |             |             |     |          |                       |
|-------------------|-------------------------------------|-------------|-------------|-----|----------|-----------------------|
| GSE1456-<br>GPL96 | Disease Specific Survival           | HG-U133A    | 208910_s_at | 159 | 0.221318 | 1.58 [0.76 -<br>3.29] |
| GSE1456-<br>GPL96 | Relapse Free Survival               | HG-U133A    | 214214_s_at | 159 | 0.080311 | 1.90 [0.93 -<br>3.90] |
| GSE7378           | Disease Free Survival               | U133AAofAv2 | 208910_s_at | 54  | 0.275125 | 1.44 [0.75 -<br>2.79] |
| GSE7378           | Disease Free Survival               | U133AAofAv2 | 214214_s_at | 54  | 0.254049 | 1.62 [0.71 -<br>3.72] |
| E-TABM-158        | Distant Metastasis Free<br>Survival | HG-U133A    | 208910_s_at | 117 | 0.406336 | 0.86 [0.59 -<br>1.23] |
| E-TABM-158        | Overall Survival                    | HG-U133A    | 208910_s_at | 117 | 0.6718   | 0.94 [0.69 -<br>1.27] |
| E-TABM-158        | Relapse Free Survival               | HG-U133A    | 214214_s_at | 117 | 0.73798  | 0.94 [0.66 -<br>1.35] |
| E-TABM-158        | Disease Specific Survival           | HG-U133A    | 214214_s_at | 117 | 0.489297 | 0.87 [0.58 -<br>1.30] |
| E-TABM-158        | Overall Survival                    | HG-U133A    | 214214_s_at | 117 | 0.73798  | 0.94 [0.66 -<br>1.35] |
| E-TABM-158        | Distant Metastasis Free<br>Survival | HG-U133A    | 214214_s_at | 117 | 0.668049 | 0.91 [0.59 -<br>1.41] |
| E-TABM-158        | Relapse Free Survival               | HG-U133A    | 208910_s_at | 117 | 0.6718   | 0.94 [0.69 -<br>1.27] |
| E-TABM-158        | Disease Specific Survival           | HG-U133A    | 208910_s_at | 117 | 0.377166 | 0.86 [0.61 -<br>1.21] |
| GSE3494-<br>GPL96 | Disease Specific Survival           | HG-U133A    | 208910_s_at | 236 | 0.477552 | 1.22 [0.70 -<br>2.12] |
| GSE3494-<br>GPL96 | Disease Specific Survival           | HG-U133A    | 214214_s_at | 236 | 0.494525 | 1.25 [0.66 -<br>2.38] |
| GSE4922-<br>GPL96 | Disease Free Survival               | HG-U133A    | 214214_s_at | 249 | 0.174824 | 1.39 [0.86 -<br>2.25] |
| GSE4922-<br>GPL96 | Disease Free Survival               | HG-U133A    | 208910_s_at | 249 | 0.151466 | 1.37 [0.89 -<br>2.09] |
| GSE2990           | Distant Metastasis Free<br>Survival | HG-U133A    | 208910_s_at | 125 | 0.310531 | 1.28 [0.79 -<br>2.06] |
| GSE2990           | Relapse Free Survival               | HG-U133A    | 214214_s_at | 62  | 0.502492 | 0.78 [0.37 -<br>1.63] |
| GSE2990           | Relapse Free Survival               | HG-U133A    | 208910_s_at | 125 | 0.536003 | 1.12 [0.78 -<br>1.63] |
| GSE2990           | Distant Metastasis Free<br>Survival | HG-U133A    | 214214_s_at | 125 | 0.169222 | 1.54 [0.83 -<br>2.87] |
| GSE2990           | Distant Metastasis Free<br>Survival | HG-U133A    | 208910_s_at | 54  | 0.638987 | 0.82 [0.35 -<br>1.90] |
| GSE2990           | Relapse Free Survival               | HG-U133A    | 214214_s_at | 125 | 0.307875 | 1.28 [0.80 -<br>2.06] |
| GSE2990           | Distant Metastasis Free<br>Survival | HG-U133A    | 214214_s_at | 54  | 0.457043 | 0.73 [0.31 -<br>1.69] |
| GSE2990           | Relapse Free Survival               | HG-U133A    | 208910_s_at | 62  | 0.784708 | 0.90 [0.44 -<br>1.86] |
| GSE7390           | Distant Metastasis Free<br>Survival | HG-U133A    | 214214_s_at | 198 | 0.618647 | 1.11 [0.74 -<br>1.65] |
| GSE7390           | Overall Survival                    | HG-U133A    | 214214_s_at | 198 | 0.624726 | 1.11 [0.73 -<br>1.69] |

|         |                                  |          |             |     |          |                    |
|---------|----------------------------------|----------|-------------|-----|----------|--------------------|
| GSE7390 | Relapse Free Survival            | HG-U133A | 208910_s_at | 198 | 0.547065 | 1.10 [0.80 - 1.52] |
| GSE7390 | Distant Metastasis Free Survival | HG-U133A | 208910_s_at | 198 | 0.775386 | 1.06 [0.72 - 1.55] |
| GSE7390 | Relapse Free Survival            | HG-U133A | 214214_s_at | 198 | 0.444162 | 1.14 [0.81 - 1.60] |
| GSE7390 | Overall Survival                 | HG-U133A | 208910_s_at | 198 | 0.818554 | 1.05 [0.70 - 1.57] |

---

**Supplementary Table S3. Datasets of *C1QBP* expression in lung cancer (Oncomine database).**

| <b>Dataset</b> | <b>Normal (Cases)</b> | <b>Tumor (Cases)</b>              | <b>Fold change</b> | <b>t-Test</b> | <b><i>p</i>-value</b> | <b>Rank (%)</b> |
|----------------|-----------------------|-----------------------------------|--------------------|---------------|-----------------------|-----------------|
| Wachi          | Lung (5)              | Squamous Cell Lung Carcinoma (5)  | 1.838              | 4.106         | 0.003                 | 6               |
| Hou            | Lung (65)             | Large Cell Lung Carcinoma (19)    | 1.928              | 5.892         | 4.39E-06              | 6               |
|                | Lung (65)             | Squamous Cell Lung Carcinoma (27) | 1.867              | 7.139         | 2.32E-08              | 8               |
|                | Lung (65)             | Lung Adenocarcinoma (45)          | 1.363              | 4.857         | 4.16E-06              | 13              |
| Landi          | Lung (49)             | Lung Adenocarcinoma (58)          | 1.468              | 5.59          | 9.42E-08              | 12              |
| Su             | Lung (30)             | Lung Adenocarcinoma (27)          | 1.235              | 2.037         | 0.024                 | 23              |
| Okayama        | Lung (20)             | Lung Adenocarcinoma (226)         | 1.182              | 3.143         | 0.002                 | 33              |

Supplementary Table S4. Survival analyses of *C1QBP* in lung cancer (Prognoscan database).

| DATASET           | SUBTYPE        | ENDPOINT                  | ARRAY TYPE           | PROBE ID     | N   | COX <i>p</i> -VALUE | HR [95% CI-low CI-upp] |
|-------------------|----------------|---------------------------|----------------------|--------------|-----|---------------------|------------------------|
| jacob-00182-CANDF | Adenocarcinoma | Overall Survival          | HG-U133A             | 208910_s_at  | 82  | 0.75218             | 1.10 [0.61 - 1.98]     |
| jacob-00182-CANDF | Adenocarcinoma | Overall Survival          | HG-U133A             | 214214_s_at  | 82  | 0.61874             | 1.21 [0.57 - 2.59]     |
| jacob-00182-HLM   | Adenocarcinoma | Overall Survival          | HG-U133A             | 208910_s_at  | 79  | 0.08171             | 1.60 [0.94 - 2.71]     |
| jacob-00182-HLM   | Adenocarcinoma | Overall Survival          | HG-U133A             | 214214_s_at  | 79  | 0.04994             | 1.77 [1.00 - 3.13]     |
| jacob-00182-MSK   | Adenocarcinoma | Overall Survival          | HG-U133A             | 214214_s_at  | 104 | 0.41293             | 0.74 [0.36 - 1.53]     |
| jacob-00182-MSK   | Adenocarcinoma | Overall Survival          | HG-U133A             | 208910_s_at  | 104 | 0.40605             | 0.80 [0.48 - 1.35]     |
| GSE13213          | Adenocarcinoma | Overall Survival          | G4112F               | A_23_P370434 | 117 | 0.08626             | 1.65 [0.93 - 2.91]     |
| GSE31210          | Adenocarcinoma | Overall Survival          | HG-U133_Plus_2       | 208910_s_at  | 204 | 0.45502             | 0.65 [0.21 - 2.03]     |
| GSE31210          | Adenocarcinoma | Overall Survival          | HG-U133_Plus_2       | 214214_s_at  | 204 | 0.64079             | 0.74 [0.21 - 2.63]     |
| GSE31210          | Adenocarcinoma | Relapse Free Survival     | HG-U133_Plus_2       | 214214_s_at  | 204 | 0.36443             | 1.52 [0.62 - 3.73]     |
| GSE31210          | Adenocarcinoma | Relapse Free Survival     | HG-U133_Plus_2       | 208910_s_at  | 204 | 0.40748             | 1.41 [0.63 - 3.18]     |
| jacob-00182-UM    | Adenocarcinoma | Overall Survival          | HG-U133A             | 208910_s_at  | 178 | 0.90606             | 0.97 [0.64 - 1.48]     |
| jacob-00182-UM    | Adenocarcinoma | Overall Survival          | HG-U133A             | 214214_s_at  | 178 | 0.69053             | 1.10 [0.69 - 1.75]     |
| GSE11117          | NSCLC          | Overall Survival          | Novachip human 34.5k | H200006536   | 41  | 0.82862             | 0.93 [0.49 - 1.78]     |
| GSE3141           | NSCLC          | Overall Survival          | HG-U133_Plus_2       | 208910_s_at  | 111 | 0.36701             | 0.82 [0.54 - 1.26]     |
| GSE3141           | NSCLC          | Overall Survival          | HG-U133_Plus_2       | 214214_s_at  | 111 | 0.99807             | 1.00 [0.66 - 1.51]     |
| GSE14814          | NSCLC          | Overall Survival          | HG-U133A             | 208910_s_at  | 90  | 0.43197             | 1.18 [0.78 - 1.81]     |
| GSE14814          | NSCLC          | Disease Specific Survival | HG-U133A             | 208910_s_at  | 90  | 0.41344             | 1.22 [0.76 - 1.97]     |
| GSE14814          | NSCLC          | Disease Specific Survival | HG-U133A             | 214214_s_at  | 90  | 0.55358             | 1.13 [0.75 - 1.70]     |

|          |                         |                       |                          |             |     |         |                    |
|----------|-------------------------|-----------------------|--------------------------|-------------|-----|---------|--------------------|
| GSE14814 | NSCLC                   | Overall Survival      | HG-U133A                 | 214214_s_at | 90  | 0.44367 | 1.15 [0.80 - 1.65] |
| GSE8894  | NSCLC                   | Relapse Free Survival | HG-U133_Plus_2           | 214214_s_at | 138 | 0.99951 | 1.00 [0.76 - 1.31] |
| GSE8894  | NSCLC                   | Relapse Free Survival | HG-U133_Plus_2           | 208910_s_at | 138 | 0.91912 | 1.01 [0.81 - 1.26] |
| GSE4573  | Squamous cell carcinoma | Overall Survival      | HG-U133A                 | 214214_s_at | 129 | 0.48793 | 1.22 [0.69 - 2.17] |
| GSE4573  | Squamous cell carcinoma | Overall Survival      | HG-U133A                 | 208910_s_at | 129 | 0.47779 | 1.24 [0.68 - 2.27] |
| GSE17710 | Squamous cell carcinoma | Relapse Free Survival | Agilent-UNC-custom-4X44K | 16225       | 56  | 0.67896 | 0.85 [0.40 - 1.83] |
| GSE17710 | Squamous cell carcinoma | Overall Survival      | Agilent-UNC-custom-4X44K | 16225       | 56  | 0.78275 | 0.89 [0.40 - 1.99] |

---



Supplementary Table S5. Datasets of *C1QBP* expression in colon cancer (Oncomine database).

| Dataset         | Normal (Cases)         | Tumor (Cases)                      | Fold change | t-Test | <i>p</i> -value | Rank (%) |
|-----------------|------------------------|------------------------------------|-------------|--------|-----------------|----------|
| Sabates-Bellver | Ascending Colon (4)    | Colon Adenoma (25)                 | 1.99        | 10.188 | 2.16E-12        | 4        |
|                 | Ascending Colon (4)    | Rectal Adenoma (7)                 | 2.386       | 7.661  | 6.33E-05        | 10       |
| Notterman       | Colon (18)             | Colon Adenocarcinoma (18)          | 2.499       | 2.754  | 0.005           | 10       |
| Graudens        | Colon (12)             | Colorectal Carcinoma (18)          | 1.133       | 2.123  | 0.022           | 22       |
| Skrzypczak      | Colorectal Tissue (24) | Colorectal Adenocarcinoma (45)     | 1.588       | 5.692  | 7.11E-07        | 9        |
|                 | Colorectal Tissue (24) | Colorectal Carcinoma (36)          | 1.502       | 4.197  | 6.68E-05        | 14       |
| TCGA            | Colon (19)             | Rectosigmoid Adenocarcinoma (3)    | 1.258       | 3.791  | 3.00E-03        | 10       |
|                 | Colon (19)             | Colon Mucinous Adenocarcinoma (22) | 1.601       | 5.051  | 8.81E-06        | 15       |
|                 | Colon (19)             | Colon Adenocarcinoma (101)         | 1.307       | 4.634  | 1.00E-05        | 24       |
| Skrzypczak 2    | Colon (19)             | Cecum Adenocarcinoma (22)          | 1.359       | 3.599  | 5.04E-04        | 25       |
|                 | Colon (10)             | Colon Adenoma (5)                  | 1.896       | 3.612  | 2.00E-03        | 17       |
| Hong            | Colon (10)             | Colon Carcinoma (5)                | 1.424       | 3.803  | 2.00E-03        | 21       |
|                 | Colon (12)             | Colorectal Carcinoma (70)          | 1.344       | 2.834  | 5.00E-03        | 31       |
| Kaiser          | Colon (5)              | Colon Mucinous Adenocarcinoma (13) | 1.225       | 1.932  | 3.60E-02        | 42       |
|                 | Rectum (65)            | Rectal Adenocarcinoma (65)         | 1.117       | 2.342  | 1.00E-02        | 44       |

Supplementary Table S6. Survival analyses of *C1QBP* in colon cancer (PrognScan database).

| DATASET  | CANCER TYPE       | ENDPOINT                  | ARRAY TYPE     | PROBE ID        | N       | COX <i>p</i> -VALUE | HR [95% CI-low CI-upp] |
|----------|-------------------|---------------------------|----------------|-----------------|---------|---------------------|------------------------|
| GSE12945 | Colorectal cancer | Disease Free Survival     | HG-U133A       | 208910_s_a<br>t | 51      | 0.551898            | 0.76 [0.30 - 1.89]     |
| GSE12945 | Colorectal cancer | Overall Survival          | HG-U133A       | 208910_s_a<br>t | 62      | 0.087815<br>3       | 1.69 [0.93 - 3.08]     |
| GSE12945 | Colorectal cancer | Disease Free Survival     | HG-U133A       | 214214_s_a<br>t | 51      | 0.563635            | 0.75 [0.29 - 1.96]     |
| GSE12945 | Colorectal cancer | Overall Survival          | HG-U133A       | 214214_s_a<br>t | 62      | 0.073658<br>3       | 1.96 [0.94 - 4.09]     |
| GSE17536 | Colorectal cancer | Disease Specific Survival | HG-U133_Plus_2 | 208910_s_a<br>t | 17<br>7 | 0.611809            | 0.87 [0.52 - 1.47]     |
| GSE17536 | Colorectal cancer | Overall Survival          | HG-U133_Plus_2 | 214214_s_a<br>t | 17<br>7 | 0.776329            | 1.07 [0.68 - 1.69]     |
| GSE17536 | Colorectal cancer | Overall Survival          | HG-U133_Plus_2 | 208910_s_a<br>t | 17<br>7 | 0.772939            | 1.07 [0.68 - 1.68]     |
| GSE17536 | Colorectal cancer | Disease Free Survival     | HG-U133_Plus_2 | 214214_s_a<br>t | 14<br>5 | 0.573441            | 0.83 [0.44 - 1.58]     |
| GSE17536 | Colorectal cancer | Disease Free Survival     | HG-U133_Plus_2 | 208910_s_a<br>t | 14<br>5 | 0.627296            | 0.86 [0.46 - 1.60]     |
| GSE17536 | Colorectal cancer | Disease Specific Survival | HG-U133_Plus_2 | 214214_s_a<br>t | 17<br>7 | 0.579844            | 0.86 [0.51 - 1.46]     |
| GSE14333 | Colorectal cancer | Disease Free Survival     | HG-U133_Plus_2 | 214214_s_a<br>t | 22<br>6 | 0.040574<br>3       | 0.54 [0.30 - 0.97]     |
| GSE14333 | Colorectal cancer | Disease Free Survival     | HG-U133_Plus_2 | 208910_s_a<br>t | 22<br>6 | 0.080507<br>2       | 0.64 [0.39 - 1.06]     |
| GSE17537 | Colorectal cancer | Disease Free Survival     | HG-U133_Plus_2 | 208910_s_a<br>t | 55      | 0.9651              | 0.99 [0.54 - 1.81]     |
| GSE17537 | Colorectal cancer | Disease Free Survival     | HG-U133_Plus_2 | 214214_s_a<br>t | 55      | 0.89308             | 1.05 [0.52 - 2.11]     |
| GSE17537 | Colorectal cancer | Disease Specific Survival | HG-U133_Plus_2 | 214214_s_a<br>t | 49      | 0.697074            | 1.21 [0.47 - 3.11]     |
| GSE17537 | Colorectal cancer | Disease Specific Survival | HG-U133_Plus_2 | 208910_s_a<br>t | 49      | 0.874998            | 0.94 [0.42 - 2.11]     |
| GSE17537 | Colorectal cancer | Overall Survival          | HG-U133_Plus_2 | 214214_s_a<br>t | 55      | 0.540262            | 1.24 [0.63 - 2.44]     |
| GSE17537 | Colorectal cancer | Overall Survival          | HG-U133_Plus_2 | 208910_s_a<br>t | 55      | 0.647753            | 1.15 [0.64 - 2.05]     |

Supplementary Table S7. Datasets of *C1QBP* expression in other cancers (Oncomine database).

| Cancer type | Dataset         | Normal (Cases)       | Tumor (Cases)                                    | Fold change                   | t-Test | p-value  | Rank (%) |
|-------------|-----------------|----------------------|--------------------------------------------------|-------------------------------|--------|----------|----------|
| Bladder     | Sanchez-Carbayo | Bladder (48)         | Superficial Bladder Cancer (28)                  | 2.835                         | 9.418  | 5.24E-14 | 6        |
|             | Dyrskjot 3      | Bladder (9)          | Superficial Bladder Cancer (28)                  | 2.421                         | 5.162  | 1.50E-05 | 13       |
|             |                 | Bladder (9)          | Infiltrating Bladder Urothelial Carcinoma (13)   | 2.81                          | 4.053  | 2.49E-04 | 14       |
| Brain       | French          | Brain (6)            | Anaplastic Oligoastrocytoma (4)                  | 2.104                         | 4.313  | 2.00E-03 | 5        |
|             |                 | Brain (6)            | Anaplastic Oligodendroglioma (23)                | 2.076                         | 4.337  | 1.00E-03 | 16       |
|             | TCGA            | Brain (10)           | Brain Glioblastoma (542)                         | 1.408                         | 4.769  | 3.82E-04 | 30       |
|             | Lee             | Neural Stem Cell (3) | Glioblastoma (22)                                | -2.261                        | -4.541 | 1.20E-02 | 43       |
| Cervix      | Biewenga        | Cervix Uteri (5)     | Cervical Squamous Cell Carcinoma (40)            | 1.639                         | 6.228  | 6.14E-05 | 13       |
| Esophagus   | Su              | Esophagus (53)       | Esophageal Squamous Cell Carcinoma (53)          | 1.669                         | 6.25   | 4.84E-09 | 10       |
|             | Esophagus 2     |                      | Esophageal Adenocarcinoma (75)                   | -2.184                        | -6.514 | 2.14E-09 | 12       |
|             | Kim             |                      | Barrett's Esophagus (15)                         | -1.529                        | -3.142 | 3.00E-03 | 32       |
| Gastric     | DErrico         | Gastric Mucosa (31)  | Gastric Intestinal Type Adenocarcinoma (26)      | 2.125                         | 6.149  | 5.55E-08 | 8        |
|             |                 | Gastric Mucosa (31)  | Diffuse Gastric Adenocarcinoma (6)               | 2.153                         | 3.328  | 6.00E-03 | 11       |
|             |                 | Gastric Mucosa (31)  | Gastric Mixed Adenocarcinoma (4)                 | 2.153                         | 3.957  | 5.00E-03 | 15       |
|             | Cho             | Gastric Tissue (19)  | Gastric Mixed Adenocarcinoma (10)                | 1.708                         | 4.546  | 6.46E-05 | 2        |
|             |                 | Gastric Tissue (19)  | Diffuse Gastric Adenocarcinoma (31)              | 1.455                         | 3.185  | 1.00E-03 | 12       |
|             | Wang            | Gastric Mucosa (12)  | Gastric Cancer (12)                              | 1.526                         | 3.103  | 3.00E-03 | 10       |
|             | Head-Neck       | Sengupta             | Nasopharynx (10)                                 | Nasopharyngeal Carcinoma (31) | 2.026  | 5.209    | 7.55E-06 |
| Giordano    |                 | Thyroid Gland (4)    | Thyroid Gland Oncocytic Follicular Carcinoma (8) | 1.213                         | 4.665  | 4.55E-04 | 2        |
|             |                 | Thyroid Gland (4)    | Thyroid Gland Oncocytic Adenoma (7)              | 1.292                         | 4.266  | 2.00E-03 | 7        |
| Kidney      | Yusenko         | Fetal Kidney (2)     | Papillary Renal Cell Carcinoma (19)              | 2.059                         | 7.493  | 5.37E-07 | 1        |
|             |                 | Fetal Kidney (2)     | Renal Oncocytoma (4)                             | 1.88                          | 8.146  | 4.35E-05 | 2        |
|             |                 | Fetal Kidney (2)     | Chromophobe Renal Cell Carcinoma (4)             | -1.639                        | -3.515 | 8.00E-03 | 7        |
|             | Jones           | Kidney (23)          | Papillary Renal Cell Carcinoma (11)              | 2.026                         | 5.41   | 2.16E-05 | 15       |
|             |                 | Kidney (23)          | Renal Pelvis Urothelial Carcinoma (8)            | 2.231                         | 3.866  | 2.00E-03 | 22       |
|             |                 | Kidney (23)          | Renal Oncocytoma (12)                            | 1.396                         | 2.427  | 1.30E-02 | 36       |

|             |           |                         |                                                     |        |        |          |    |
|-------------|-----------|-------------------------|-----------------------------------------------------|--------|--------|----------|----|
|             | Beroukhim | Renal Cortex (10)       | Non-Hereditary Clear Cell Renal Cell Carcinoma (27) | -1.332 | -2.962 | 3.00E-03 | 20 |
|             | Lenburg   | Kidney (9)              | Clear Cell Renal Cell Carcinoma (9)                 | -1.792 | -2.586 | 1.00E-02 | 15 |
| Lymphoma    | Brune     | Memory B-Lymphocyte (5) | Burkitt's Lymphoma (5)                              | 5.161  | 8.914  | 4.58E-06 | 3  |
|             |           | Memory B-Lymphocyte (5) | Diffuse Large B-Cell Lymphoma (11)                  | 2.96   | 6.153  | 1.54E-06 | 3  |
|             | Eckerle   | Natural Killer Cell (5) | Anaplastic Large Cell Lymphoma, ALK-Positive (5)    | 3.869  | 6.994  | 1.83E-04 | 6  |
| Myeloma     | Agnelli   | Plasma Cell (5)         | Plasma Cell Leukemia (9)                            | 2.549  | 3.889  | 0.001    | 8  |
|             | Zhan      | Bone Marrow (22)        | Smoldering Myeloma (12)                             | 2.662  | 6.893  | 6.04E-07 | 6  |
| Parathyroid | Morrison  | Parathyroid Gland (5)   | Parathyroid Hyperplasia (8)                         | 3.145  | 4.069  | 9.53E-04 | 3  |
|             |           | Parathyroid Gland (5)   | Non-Familial Multiple Gland Neoplasia (10)          | 3.373  | 4.209  | 5.54E-04 | 4  |
|             |           | Parathyroid Gland (5)   | Familial Parathyroid Hyperplasia (3)                | 2.965  | 3.556  | 0.011    | 4  |
|             |           | Parathyroid Gland (5)   | Parathyroid Gland Adenoma (35)                      | 4.232  | 7.217  | 2.17E-04 | 5  |
| Seminoma    | Korkola   | Testis (6)              | Seminoma, NOS (12)                                  | 2.592  | 6.924  | 4.03E-06 | 10 |

Supplementary Table S8. Survival analyses of *C1QBP* in other cancers (Prognoscan database).

| DATASET         | CANCER TYPE    | SUBTYPE             | ENDPOINT                  | ARRAY TYPE     | PROBE ID     | N   | COX <i>p</i> -VALUE | HR [95% CI-low CI-upp] |
|-----------------|----------------|---------------------|---------------------------|----------------|--------------|-----|---------------------|------------------------|
| GSE5287         | Bladder cancer |                     | Overall Survival          | HG-U133A       | 214214_s_at  | 30  | 0.062814            | 0.55 [0.29 - 1.03]     |
| GSE5287         | Bladder cancer |                     | Overall Survival          | HG-U133A       | 208910_s_at  | 30  | 0.281045            | 0.73 [0.41 - 1.30]     |
| GSE13507        | Bladder cancer |                     | Overall Survival          | Human-6 v2     | ILMN_1668996 | 165 | 0.755308            | 1.05 [0.77 - 1.42]     |
| GSE13507        | Bladder cancer |                     | Disease Specific Survival | Human-6 v2     | ILMN_1668996 | 165 | 0.93875             | 1.02 [0.64 - 1.61]     |
| GSE12417-GPL96  | Blood cancer   | AML                 | Overall Survival          | HG-U133A       | 208910_s_at  | 163 | 0.469962            | 1.10 [0.85 - 1.40]     |
| GSE12417-GPL96  | Blood cancer   | AML                 | Overall Survival          | HG-U133A       | 214214_s_at  | 163 | 0.453089            | 1.10 [0.85 - 1.43]     |
| GSE12417-GPL570 | Blood cancer   | AML                 | Overall Survival          | HG-U133_Plus_2 | 214214_s_at  | 79  | 0.105577            | 1.48 [0.92 - 2.38]     |
| GSE12417-GPL570 | Blood cancer   | AML                 | Overall Survival          | HG-U133_Plus_2 | 208910_s_at  | 79  | 0.127272            | 1.35 [0.92 - 2.00]     |
| GSE5122         | Blood cancer   | AML                 | Overall Survival          | HG-U133A       | 214214_s_at  | 58  | 0.329452            | 0.76 [0.44 - 1.32]     |
| GSE5122         | Blood cancer   | AML                 | Overall Survival          | HG-U133A       | 208910_s_at  | 58  | 0.56243             | 0.90 [0.63 - 1.29]     |
| GSE8970         | Blood cancer   | AML                 | Overall Survival          | HG-U133A       | 208910_s_at  | 34  | 0.286225            | 1.54 [0.69 - 3.43]     |
| GSE8970         | Blood cancer   | AML                 | Overall Survival          | HG-U133A       | 214214_s_at  | 34  | 0.571717            | 1.21 [0.63 - 2.33]     |
| GSE4475         | Blood cancer   | B-cell lymphoma     | Overall Survival          | HG-U133A       | 214214_s_at  | 158 | 0.0946979           | 0.78 [0.58 - 1.04]     |
| GSE4475         | Blood cancer   | B-cell lymphoma     | Overall Survival          | HG-U133A       | 208910_s_at  | 158 | 0.0295261           | 0.71 [0.53 - 0.97]     |
| E-TABM-346      | Blood cancer   | DLBCL               | Overall Survival          | HG-U133A       | 208910_s_at  | 53  | 0.134125            | 0.55 [0.25 - 1.21]     |
| E-TABM-346      | Blood cancer   | DLBCL               | Overall Survival          | HG-U133A       | 214214_s_at  | 53  | 0.169011            | 0.54 [0.23 - 1.30]     |
| E-TABM-346      | Blood cancer   | DLBCL               | Event Free Survival       | HG-U133A       | 208910_s_at  | 53  | 0.182424            | 0.59 [0.27 - 1.28]     |
| E-TABM-346      | Blood cancer   | DLBCL               | Event Free Survival       | HG-U133A       | 214214_s_at  | 53  | 0.141018            | 0.53 [0.23 - 1.23]     |
| GSE16131-GPL96  | Blood cancer   | Follicular lymphoma | Overall Survival          | HG-U133A       | 214214_s_at  | 180 | 0.343015            | 0.80 [0.51 - 1.27]     |
| GSE16131-GPL96  | Blood cancer   | Follicular lymphoma | Overall Survival          | HG-U133A       | 208910_s_at  | 180 | 0.236042            | 0.78 [0.52 - 1.18]     |
| GSE2658         | Blood cancer   | Multiple myeloma    | Disease Specific Survival | HG-U133_Plus_2 | 214214_s_at  | 559 | 0.294184            | 1.28 [0.81 - 2.02]     |
| GSE2658         | Blood cancer   | Multiple myeloma    | Disease Specific Survival | HG-U133_Plus_2 | 208910_s_at  | 559 | 0.158587            | 1.33 [0.89 - 1.97]     |
| GSE4271-GPL96   | Brain cancer   | Astrocytoma         | Overall Survival          | HG-U133A       | 208910_s_at  | 77  | 0.0793001           | 1.88 [0.93 - 3.80]     |
| GSE4271-GPL96   | Brain cancer   | Astrocytoma         | Overall Survival          | HG-U133A       | 214214_s_at  | 77  | 0.0920103           | 1.87 [0.90 - 3.85]     |
| GSE7696         | Brain cancer   | Glioblastoma        | Overall Survival          | HG-U133_Plus_2 | 214214_s_at  | 70  | 0.190584            | 0.67 [0.37 - 1.22]     |

|               |                      |                         |                                  |                |                       |     |            |                     |
|---------------|----------------------|-------------------------|----------------------------------|----------------|-----------------------|-----|------------|---------------------|
| GSE7696       | Brain cancer         | Glioblastoma            | Overall Survival                 | HG-U133_Plus_2 | 208910_s_at           | 70  | 0.381773   | 0.82 [0.52 - 1.29]  |
| GSE4412-GPL96 | Brain cancer         | Glioma                  | Overall Survival                 | HG-U133A       | 208910_s_at           | 74  | 0.0331974  | 0.35 [0.13 - 0.92]  |
| GSE4412-GPL96 | Brain cancer         | Glioma                  | Overall Survival                 | HG-U133A       | 214214_s_at           | 74  | 0.626016   | 0.76 [0.25 - 2.28]  |
| GSE16581      | Brain cancer         | Meningioma              | Overall Survival                 | HG-U133_Plus_2 | 214214_s_at           | 67  | 0.407419   | 2.40 [0.30 - 19.16] |
| GSE16581      | Brain cancer         | Meningioma              | Overall Survival                 | HG-U133_Plus_2 | 208910_s_at           | 67  | 0.432774   | 2.42 [0.27 - 22.09] |
| GSE22138      | Eye cancer           | Uveal melanoma          | Distant Metastasis Free Survival | HG-U133_Plus_2 | 214214_s_at           | 63  | 0.185756   | 1.50 [0.82 - 2.71]  |
| GSE22138      | Eye cancer           | Uveal melanoma          | Distant Metastasis Free Survival | HG-U133_Plus_2 | 208910_s_at           | 63  | 0.184453   | 1.41 [0.85 - 2.33]  |
| GSE2837       | Head and neck cancer | Squamous cell carcinoma | Relapse Free Survival            | U133_X3P       | Hs.78614.3.A1_3p_a_at | 28  | 0.963406   | 0.99 [0.62 - 1.57]  |
| GSE9891       | Ovarian cancer       |                         | Overall Survival                 | HG-U133_Plus_2 | 208910_s_at           | 278 | 0.00451267 | 0.59 [0.41 - 0.85]  |
| GSE9891       | Ovarian cancer       |                         | Overall Survival                 | HG-U133_Plus_2 | 214214_s_at           | 278 | 0.0131126  | 0.64 [0.45 - 0.91]  |
| DUKE-OC       | Ovarian cancer       |                         | Overall Survival                 | HG-U133A       | 214214_s_at           | 133 | 0.466614   | 0.89 [0.64 - 1.22]  |
| DUKE-OC       | Ovarian cancer       |                         | Overall Survival                 | HG-U133A       | 208910_s_at           | 133 | 0.515996   | 0.94 [0.77 - 1.14]  |
| GSE8841       | Ovarian cancer       |                         | Overall Survival                 | G4100A         | 18486                 | 81  | 0.708878   | 0.85 [0.37 - 1.97]  |
| GSE26712      | Ovarian cancer       |                         | Overall Survival                 | HG-U133_Plus_2 | 214214_s_at           | 185 | 0.809756   | 1.02 [0.87 - 1.19]  |
| GSE26712      | Ovarian cancer       |                         | Overall Survival                 | HG-U133_Plus_2 | 208910_s_at           | 185 | 0.897145   | 0.99 [0.84 - 1.17]  |
| GSE26712      | Ovarian cancer       |                         | Disease Free Survival            | HG-U133_Plus_2 | 208910_s_at           | 185 | 0.881351   | 0.99 [0.85 - 1.15]  |
| GSE26712      | Ovarian cancer       |                         | Disease Free Survival            | HG-U133_Plus_2 | 214214_s_at           | 185 | 0.949237   | 1.00 [0.87 - 1.16]  |
| GSE17260      | Ovarian cancer       |                         | Progression Free Survival        | G4112A         | A_23_P370434          | 110 | 0.664848   | 1.08 [0.76 - 1.55]  |
| GSE17260      | Ovarian cancer       |                         | Overall Survival                 | G4112A         | A_23_P370434          | 110 | 0.456883   | 1.19 [0.76 - 1.87]  |
| GSE14764      | Ovarian cancer       |                         | Overall Survival                 | HG-U133A       | 214214_s_at           | 80  | 0.504511   | 1.22 [0.68 - 2.20]  |
| GSE14764      | Ovarian cancer       |                         | Overall Survival                 | HG-U133A       | 208910_s_at           | 80  | 0.787616   | 1.09 [0.60 - 1.98]  |
| E-DKFZ-1      | Renal cell carcinoma |                         | Overall Survival                 | A-RZPD-20      | 28429                 | 59  | 0.994155   | 0.99 [0.14 - 6.86]  |
| GSE19234      | Skin cancer          | Melanoma                | Overall Survival                 | HG-U133_Plus_2 | 208910_s_at           | 38  | 0.00638691 | 5.58 [1.62 - 19.17] |
| GSE19234      | Skin cancer          | Melanoma                | Overall Survival                 | HG-U133_Plus_2 | 214214_s_at           | 38  | 0.0200671  | 4.04 [1.25 - 13.11] |

|          |                    |             |                                  |          |             |     |          |                    |
|----------|--------------------|-------------|----------------------------------|----------|-------------|-----|----------|--------------------|
| GSE30929 | Soft tissue cancer | Liposarcoma | Distant Recurrence Free Survival | HG-U133A | 208910_s_at | 140 | 0.324408 | 1.35 [0.75 - 2.43] |
| GSE30929 | Soft tissue cancer | Liposarcoma | Distant Recurrence Free Survival | HG-U133A | 214214_s_at | 140 | 0.351669 | 1.29 [0.76 - 2.19] |

---

**Supplementary Table S9. Gene ontology (GO) terms obtained from genes positively correlated with C1QBP.**

| Gene Ontology term                                | Cluster frequency     | Genome frequency            | Corrected <i>p</i> -value |
|---------------------------------------------------|-----------------------|-----------------------------|---------------------------|
| <b>Biological Process</b>                         |                       |                             |                           |
| ribosome biogenesis                               | 19 of 67 genes, 28.4% | 291 of 19782 genes, 1.5%    | 9.32E-17                  |
| ribonucleoprotein complex biogenesis              | 20 of 67 genes, 29.9% | 456 of 19782 genes, 2.3%    | 2.17E-14                  |
| translation                                       | 21 of 67 genes, 31.3% | 645 of 19782 genes, 3.3%    | 1.19E-12                  |
| peptide biosynthetic process                      | 21 of 67 genes, 31.3% | 670 of 19782 genes, 3.4%    | 2.53E-12                  |
| cellular nitrogen compound metabolic process      | 53 of 67 genes, 79.1% | 6598 of 19782 genes, 33.4%  | 1.57E-11                  |
| amide biosynthetic process                        | 21 of 67 genes, 31.3% | 805 of 19782 genes, 4.1%    | 9.25E-11                  |
| peptide metabolic process                         | 21 of 67 genes, 31.3% | 819 of 19782 genes, 4.1%    | 1.29E-10                  |
| RNA processing                                    | 21 of 67 genes, 31.3% | 927 of 19782 genes, 4.7%    | 1.39E-09                  |
| ribosomal large subunit biogenesis                | 9 of 67 genes, 13.4%  | 73 of 19782 genes, 0.4%     | 2.35E-09                  |
| ncRNA metabolic process                           | 17 of 67 genes, 25.4% | 566 of 19782 genes, 2.9%    | 3.49E-09                  |
| gene expression                                   | 46 of 67 genes, 68.7% | 5502 of 19782 genes, 27.8%  | 3.54E-09                  |
| mitochondrial gene expression                     | 11 of 67 genes, 16.4% | 160 of 19782 genes, 0.8%    | 5.11E-09                  |
| cellular amide metabolic process                  | 21 of 67 genes, 31.3% | 1076 of 19782 genes, 5.4%   | 2.33E-08                  |
| ncRNA processing                                  | 14 of 67 genes, 20.9% | 385 of 19782 genes, 1.9%    | 2.91E-08                  |
| rRNA processing                                   | 11 of 67 genes, 16.4% | 207 of 19782 genes, 1.0%    | 8.33E-08                  |
| cellular component organization or biogenesis     | 48 of 67 genes, 71.6% | 6577 of 19782 genes, 33.2%  | 0.000000121               |
| nucleobase-containing compound metabolic process  | 45 of 67 genes, 67.2% | 5904 of 19782 genes, 29.8%  | 0.000000259               |
| cellular component biogenesis                     | 33 of 67 genes, 49.3% | 3226 of 19782 genes, 16.3%  | 0.000000332               |
| cellular metabolic process                        | 60 of 67 genes, 89.6% | 10759 of 19782 genes, 54.4% | 0.000000451               |
| rRNA metabolic process                            | 11 of 67 genes, 16.4% | 243 of 19782 genes, 1.2%    | 0.000000461               |
| mitochondrial translation                         | 9 of 67 genes, 13.4%  | 135 of 19782 genes, 0.7%    | 0.000000643               |
| organonitrogen compound biosynthetic process      | 25 of 67 genes, 37.3% | 1882 of 19782 genes, 9.5%   | 0.000000675               |
| heterocycle metabolic process                     | 45 of 67 genes, 67.2% | 6066 of 19782 genes, 30.7%  | 0.000000687               |
| cellular aromatic compound metabolic process      | 45 of 67 genes, 67.2% | 6112 of 19782 genes, 30.9%  | 0.0000009                 |
| ribosome assembly                                 | 7 of 67 genes, 10.4%  | 67 of 19782 genes, 0.3%     | 0.00000235                |
| organic cyclic compound metabolic process         | 45 of 67 genes, 67.2% | 6323 of 19782 genes, 32.0%  | 0.000003                  |
| macromolecule metabolic process                   | 55 of 67 genes, 82.1% | 9507 of 19782 genes, 48.1%  | 0.00000734                |
| nucleic acid metabolic process                    | 40 of 67 genes, 59.7% | 5225 of 19782 genes, 26.4%  | 0.00000813                |
| nitrogen compound metabolic process               | 57 of 67 genes, 85.1% | 10285 of 19782 genes, 52.0% | 0.0000103                 |
| translational elongation                          | 8 of 67 genes, 11.9%  | 135 of 19782 genes, 0.7%    | 0.0000152                 |
| primary metabolic process                         | 58 of 67 genes, 86.6% | 10780 of 19782 genes, 54.5% | 0.0000182                 |
| metabolic process                                 | 60 of 67 genes, 89.6% | 11606 of 19782 genes, 58.7% | 0.0000222                 |
| posttranscriptional regulation of gene expression | 13 of 67 genes, 19.4% | 570 of 19782 genes, 2.9%    | 0.000043                  |
| translational termination                         | 7 of 67 genes, 10.4%  | 104 of 19782 genes, 0.5%    | 0.0000521                 |



|                                                                             |                       |                             |           |
|-----------------------------------------------------------------------------|-----------------------|-----------------------------|-----------|
| organic substance metabolic process                                         | 58 of 67 genes, 86.6% | 11123 of 19782 genes, 56.2% | 0.0000805 |
| RNA localization                                                            | 9 of 67 genes, 13.4%  | 235 of 19782 genes, 1.2%    | 0.0000814 |
| mRNA metabolic process                                                      | 15 of 67 genes, 22.4% | 840 of 19782 genes, 4.2%    | 0.0000874 |
| ribonucleoprotein complex assembly                                          | 9 of 67 genes, 13.4%  | 241 of 19782 genes, 1.2%    | 0.0001    |
| cellular nitrogen compound biosynthetic process                             | 37 of 67 genes, 55.2% | 4985 of 19782 genes, 25.2%  | 0.00012   |
| ribonucleoprotein complex subunit organization                              | 9 of 67 genes, 13.4%  | 255 of 19782 genes, 1.3%    | 0.00016   |
| regulation of translation                                                   | 10 of 67 genes, 14.9% | 340 of 19782 genes, 1.7%    | 0.00017   |
| establishment of protein localization to organelle                          | 12 of 67 genes, 17.9% | 534 of 19782 genes, 2.7%    | 0.00017   |
| mitochondrial translational elongation                                      | 6 of 67 genes, 9.0%   | 88 of 19782 genes, 0.4%     | 0.00044   |
| regulation of cellular amide metabolic process                              | 10 of 67 genes, 14.9% | 392 of 19782 genes, 2.0%    | 0.00064   |
| macromolecule biosynthetic process                                          | 36 of 67 genes, 53.7% | 5059 of 19782 genes, 25.6%  | 0.00068   |
| cellular component organization                                             | 41 of 67 genes, 61.2% | 6402 of 19782 genes, 32.4%  | 0.00098   |
| cellular macromolecule biosynthetic process                                 | 35 of 67 genes, 52.2% | 4920 of 19782 genes, 24.9%  | 0.00115   |
| regulation of mitochondrial translation                                     | 4 of 67 genes, 6.0%   | 25 of 19782 genes, 0.1%     | 0.00123   |
| protein-containing complex subunit organization                             | 22 of 67 genes, 32.8% | 2197 of 19782 genes, 11.1%  | 0.00146   |
| nucleocytoplasmic transport                                                 | 9 of 67 genes, 13.4%  | 342 of 19782 genes, 1.7%    | 0.00188   |
| nuclear transport                                                           | 9 of 67 genes, 13.4%  | 345 of 19782 genes, 1.7%    | 0.00202   |
| positive regulation of translation                                          | 6 of 67 genes, 9.0%   | 120 of 19782 genes, 0.6%    | 0.00278   |
| cellular biosynthetic process                                               | 39 of 67 genes, 58.2% | 6112 of 19782 genes, 30.9%  | 0.00285   |
| telomere maintenance via telomerase                                         | 5 of 67 genes, 7.5%   | 70 of 19782 genes, 0.4%     | 0.00335   |
| ribosomal large subunit assembly                                            | 4 of 67 genes, 6.0%   | 32 of 19782 genes, 0.2%     | 0.00345   |
| protein localization to nuclear body                                        | 3 of 67 genes, 4.5%   | 10 of 19782 genes, 0.1%     | 0.00375   |
| positive regulation of establishment of protein localization to telomere    | 3 of 67 genes, 4.5%   | 10 of 19782 genes, 0.1%     | 0.00375   |
| protein localization to Cajal body                                          | 3 of 67 genes, 4.5%   | 10 of 19782 genes, 0.1%     | 0.00375   |
| RNA metabolic process                                                       | 33 of 67 genes, 49.3% | 4693 of 19782 genes, 23.7%  | 0.00406   |
| organic substance biosynthetic process                                      | 39 of 67 genes, 58.2% | 6206 of 19782 genes, 31.4%  | 0.00431   |
| regulation of establishment of protein localization to telomere             | 3 of 67 genes, 4.5%   | 11 of 19782 genes, 0.1%     | 0.00515   |
| biosynthetic process                                                        | 39 of 67 genes, 58.2% | 6280 of 19782 genes, 31.7%  | 0.00593   |
| regulation of establishment of protein localization to chromosome           | 3 of 67 genes, 4.5%   | 12 of 19782 genes, 0.1%     | 0.00685   |
| positive regulation of protein localization to chromosome, telomeric region | 3 of 67 genes, 4.5%   | 12 of 19782 genes, 0.1%     | 0.00685   |
| protein localization to nucleoplasm                                         | 3 of 67 genes, 4.5%   | 12 of 19782 genes, 0.1%     | 0.00685   |
| telomere maintenance via telomere lengthening                               | 5 of 67 genes, 7.5%   | 81 of 19782 genes, 0.4%     | 0.00689   |
| positive regulation of cellular amide metabolic process                     | 6 of 67 genes, 9.0%   | 141 of 19782 genes, 0.7%    | 0.00705   |
| protein localization to organelle                                           | 13 of 67 genes, 19.4% | 899 of 19782 genes, 4.5%    | 0.0072    |

|                                              |                       |                             |             |
|----------------------------------------------|-----------------------|-----------------------------|-------------|
| cellular protein complex disassembly         | 7 of 67 genes, 10.4%  | 217 of 19782 genes, 1.1%    | 0.0074      |
| RNA-dependent DNA biosynthetic process       | 5 of 67 genes, 7.5%   | 83 of 19782 genes, 0.4%     | 0.00777     |
| <b>Molecular Function</b>                    |                       |                             |             |
| RNA binding                                  | 39 of 67 genes, 58.2% | 1654 of 19782 genes, 8.4%   | 4.88E-23    |
| nucleic acid binding                         | 40 of 67 genes, 59.7% | 4128 of 19782 genes, 20.9%  | 6.73E-10    |
| heterocyclic compound binding                | 46 of 67 genes, 68.7% | 6068 of 19782 genes, 30.7%  | 2.33E-08    |
| organic cyclic compound binding              | 46 of 67 genes, 68.7% | 6155 of 19782 genes, 31.1%  | 3.95E-08    |
| structural constituent of ribosome           | 8 of 67 genes, 11.9%  | 173 of 19782 genes, 0.9%    | 0.0000169   |
| ribonucleoprotein complex binding            | 6 of 67 genes, 9.0%   | 132 of 19782 genes, 0.7%    | 0.00078     |
| mRNA binding                                 | 7 of 67 genes, 10.4%  | 243 of 19782 genes, 1.2%    | 0.00249     |
| binding                                      | 64 of 67 genes, 95.5% | 15184 of 19782 genes, 76.8% | 0.00424     |
| translation elongation factor activity       | 3 of 67 genes, 4.5%   | 21 of 19782 genes, 0.1%     | 0.00657     |
| <b>Cellular Component</b>                    |                       |                             |             |
| organelle part                               | 61 of 67 genes, 91.0% | 9599 of 19782 genes, 48.5%  | 2.33E-11    |
| mitochondrial part                           | 23 of 67 genes, 34.3% | 1046 of 19782 genes, 5.3%   | 3.45E-11    |
| intracellular organelle part                 | 60 of 67 genes, 89.6% | 9298 of 19782 genes, 47.0%  | 3.95E-11    |
| mitochondrion                                | 26 of 67 genes, 38.8% | 1593 of 19782 genes, 8.1%   | 5.52E-10    |
| ribonucleoprotein complex                    | 20 of 67 genes, 29.9% | 858 of 19782 genes, 4.3%    | 6.68E-10    |
| protein-containing complex                   | 45 of 67 genes, 67.2% | 5397 of 19782 genes, 27.3%  | 1.99E-09    |
| membrane-enclosed lumen                      | 44 of 67 genes, 65.7% | 5235 of 19782 genes, 26.5%  | 3.54E-09    |
| organelle lumen                              | 44 of 67 genes, 65.7% | 5235 of 19782 genes, 26.5%  | 3.54E-09    |
| intracellular organelle lumen                | 44 of 67 genes, 65.7% | 5235 of 19782 genes, 26.5%  | 3.54E-09    |
| intracellular membrane-bounded organelle     | 62 of 67 genes, 92.5% | 11017 of 19782 genes, 55.7% | 5.3E-09     |
| membrane-bounded organelle                   | 65 of 67 genes, 97.0% | 12527 of 19782 genes, 63.3% | 6.68E-09    |
| mitochondrial matrix                         | 15 of 67 genes, 22.4% | 469 of 19782 genes, 2.4%    | 6.69E-09    |
| intracellular non-membrane-bounded organelle | 39 of 67 genes, 58.2% | 4229 of 19782 genes, 21.4%  | 1.03E-08    |
| non-membrane-bounded organelle               | 39 of 67 genes, 58.2% | 4239 of 19782 genes, 21.4%  | 1.11E-08    |
| organelle envelope                           | 21 of 67 genes, 31.3% | 1192 of 19782 genes, 6.0%   | 3.23E-08    |
| envelope                                     | 21 of 67 genes, 31.3% | 1192 of 19782 genes, 6.0%   | 3.23E-08    |
| cytoplasm                                    | 62 of 67 genes, 92.5% | 11606 of 19782 genes, 58.7% | 9.67E-08    |
| mitochondrial inner membrane                 | 14 of 67 genes, 20.9% | 476 of 19782 genes, 2.4%    | 9.79E-08    |
| nucleolus                                    | 18 of 67 genes, 26.9% | 932 of 19782 genes, 4.7%    | 0.000000208 |
| mitochondrial membrane                       | 16 of 67 genes, 23.9% | 706 of 19782 genes, 3.6%    | 0.000000214 |
| nuclear part                                 | 38 of 67 genes, 56.7% | 4483 of 19782 genes, 22.7%  | 0.000000305 |
| organelle inner membrane                     | 14 of 67 genes, 20.9% | 535 of 19782 genes, 2.7%    | 0.000000442 |
| mitochondrial envelope                       | 16 of 67 genes, 23.9% | 748 of 19782 genes, 3.8%    | 0.000000491 |
| organelle                                    | 65 of 67 genes, 97.0% | 13632 of 19782 genes, 68.9% | 0.0000012   |
| ribosome                                     | 10 of 67 genes, 14.9% | 242 of 19782 genes, 1.2%    | 0.00000149  |
| intracellular organelle                      | 63 of 67 genes, 94.0% | 12805 of 19782 genes, 64.7% | 0.00000286  |
| ribosomal subunit                            | 9 of 67 genes, 13.4%  | 196 of 19782 genes, 1.0%    | 0.00000354  |
| intracellular                                | 66 of 67 genes, 98.5% | 14601 of 19782 genes, 73.8% | 0.0000062   |

|                                   |                       |                             |           |
|-----------------------------------|-----------------------|-----------------------------|-----------|
| intracellular part                | 66 of 67 genes, 98.5% | 14601 of 19782 genes, 73.8% | 0.0000062 |
| cytoplasmic part                  | 54 of 67 genes, 80.6% | 9723 of 19782 genes, 49.2%  | 0.0000185 |
| nucleus                           | 46 of 67 genes, 68.7% | 7399 of 19782 genes, 37.4%  | 0.0000359 |
| nuclear lumen                     | 32 of 67 genes, 47.8% | 4093 of 19782 genes, 20.7%  | 0.00011   |
| cytosolic part                    | 8 of 67 genes, 11.9%  | 255 of 19782 genes, 1.3%    | 0.00041   |
| cytosolic large ribosomal subunit | 5 of 67 genes, 7.5%   | 65 of 19782 genes, 0.3%     | 0.00048   |
| large ribosomal subunit           | 6 of 67 genes, 9.0%   | 123 of 19782 genes, 0.6%    | 0.00066   |
| cytosol                           | 33 of 67 genes, 49.3% | 5088 of 19782 genes, 25.7%  | 0.0052    |
| mitochondrial protein complex     | 7 of 67 genes, 10.4%  | 272 of 19782 genes, 1.4%    | 0.00658   |
| cytosolic ribosome                | 5 of 67 genes, 7.5%   | 117 of 19782 genes, 0.6%    | 0.00852   |

---

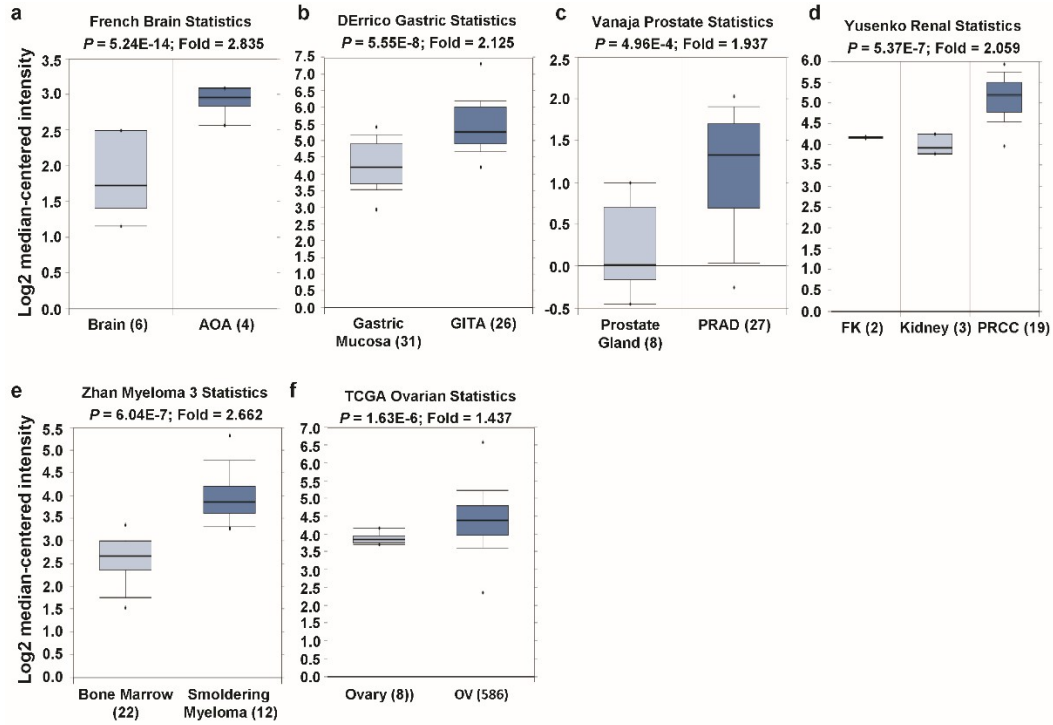

**Supplementary Figure S1.** *CIQBP* expression analysis in different cancer types (Oncomine database). The box plot comparing specific *CIQBP* expression in normal (left plot) and cancer tissue (right plot) was derived from Oncomine database. The fold change of *CIQBP* in various cancer types was identified from our analyses. The analysis was shown in AOA relative to normal brain (a), in GITA relative to Gastric Mucosa (a), in PRAD relative to normal Prostate Gland (c), in PRCC relative to normal Kidney (d), in Smoldering Myeloma relative to normal Bone Marrow (e), in OV relative to normal Ovary (f). (Abbreviations: AOA-Anaplastic Oligoastrocytoma; FK-Fetal Kidney; SBC-Superficial Bladder Cancer; GITA-Gastric Intestinal Type Adenocarcinoma; PRAD-PAAD-Pancreatic adenocarcinoma; PRCC-Papillary Renal Cell Carcinoma; NPCBL- Naive Pregerminal Center B-Lymphocyte; OV-Ovarian Serous Cystadenocarcinoma).

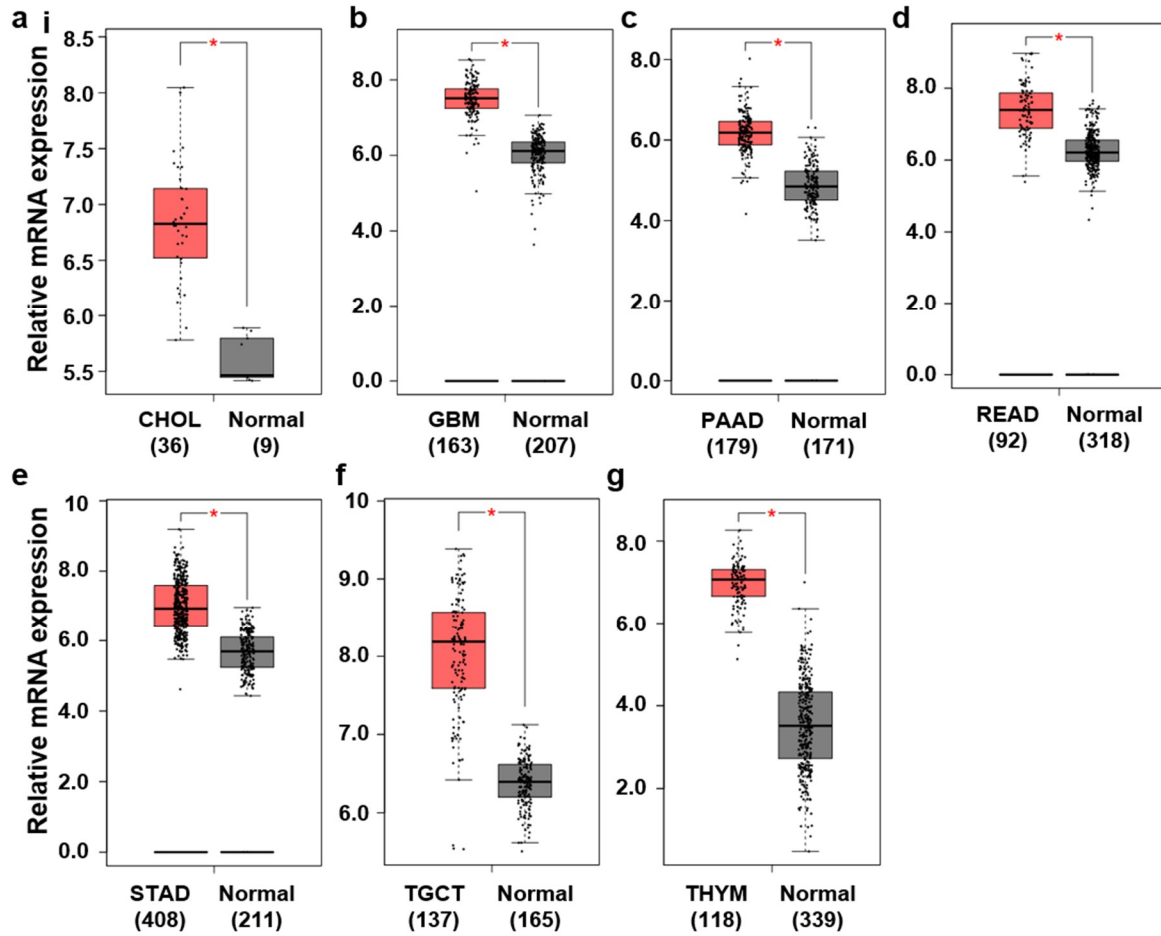

**Supplementary Figure S2.** *CIQBP* expression analysis in different cancer types (TCGA database). Expression of *CIQBP* gene in the Cancer Genome Atlas (TCGA) database. Box plots showing the *CIQBP* mRNA expression in various tumor (T) and their normal (N) tissues, using data from the TCGA database through GEPIA web (a-g). The threshold was designed with specific parameters; \*:  $p$ -value = 0.01, fold change = 2. (Abbreviations: CHOL-Cholangio carcinoma; DLBC-Lymphoid Neoplasm Diffuse Large B-cell Lymphoma; GBM-Glioblastoma multiforme; PAAD-Pancreatic adenocarcinoma; READ-Rectum adenocarcinoma; STAD-Stomach adenocarcinoma; TGCT-Testicular Germ Cell Tumors; THYM-Thymoma).

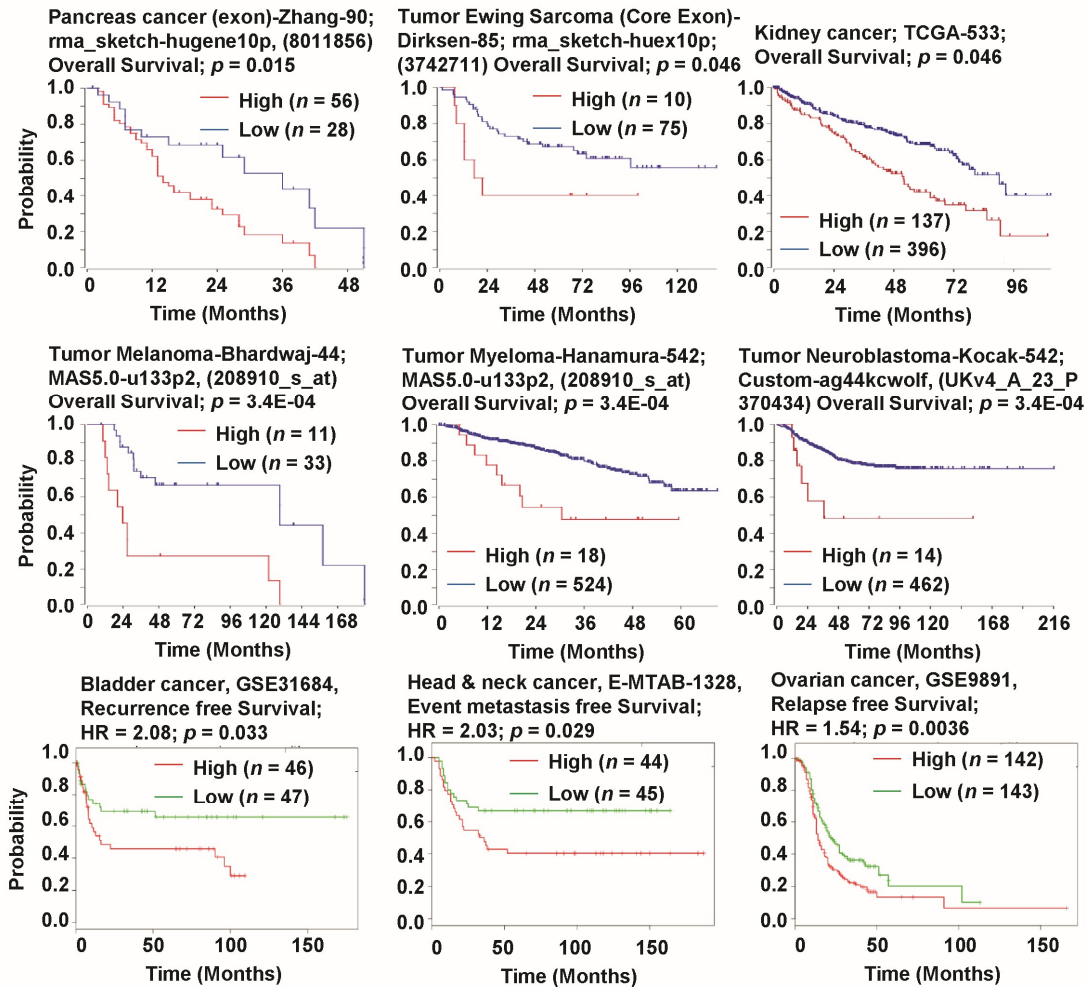

**Supplementary Figure S3.** Correlation of *CIQBP* gene expression with various cancer prognosis (R2: Kaplan Meier Scanner and SurvExpress). The survival curve comparing the patient with high (red) and low (blue/green) expression of *CIQBP* was plotted from R2: Kaplan Meier Scanner and SurvExpress database in pancreas, lymphoma, sarcoma, kidney, melanoma, myeloma, brain, bladder, head & neck, and ovarian cancers. Survival curve analysis was conducted using a threshold Cox  $p$ -value  $< 0.05$ .

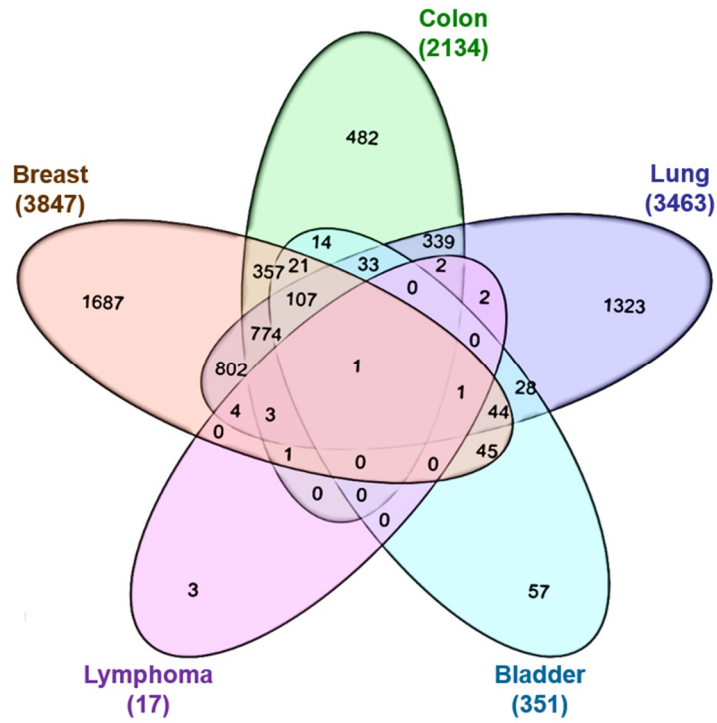

**Supplementary Figure S4.** Analysis of negatively correlated genes of *CIQBP*. Venn diagram of genes negatively correlated to *CIQBP*, showing coincident genes in Breast, Colon, Lung, Bladder, and Lymphoma cancers.
